# Supplementary material for: The interplay of mutations and electronic properties in disease-related genes
Source: PubMed Central journal article supplement — Sci Rep. 2012 Feb 15;2:272. doi: 10.1038/srep00272 (PMC3280594; doi:10.1038/srep00272), 2012-02-15
Supplement: srep00272-s1.pdf [file srep00272-s1.pdf]

## Supplementary Material

### The interplay of mutations and electronic properties in disease-related genes

Chi-Tin Shih<sup>1,\*</sup>, Stephen A. Wells<sup>2</sup>, Ching-Ling Hsu<sup>3</sup>, Yun-Yin Cheng<sup>1</sup>, & Rudolf A. Römer<sup>2,\*</sup>

<sup>1</sup>*Department of Physics, Tunghai University, 40704 Taichung, Taiwan and The National Center for Theoretical Sciences, 30013 Hsinchu, Taiwan*

<sup>2</sup>*Department of Physics and Centre for Scientific Computing, University of Warwick, Gibbet Hill Road, Coventry, CV4 7AL, UK*

<sup>3</sup>*Department of Physics, Chung-Yuan Christian University, 32023 Chung-Li, Taiwan*

*\*Correspondence and requests for materials should be addressed to CTS (email: ct-shih@thu.edu.tw) or RAR (email: r.roemer@warwick.ac.uk).*

### Comparing the Averaged Electronic Properties for the Pathogenic and Non-pathogenic Mutations for Each Gene

We denote the genomic sequence of a gene with length  $\mathcal{N}$  base pairs (bps) as  $(s_1, s_2, \dots, s_{\mathcal{N}})$ . Each point mutation of a given gene is characterized by the set  $(k, s)$ , where  $k$  and  $s$  are the position of the point mutation in the genomic sequence and the mutant nucleotide which replaces the nucleotide  $s_k$  of normal DNA, respectively. There are totally  $3\mathcal{N}$  possible point mutations of a gene with  $\mathcal{N}$  bps. The sets of these  $3\mathcal{N}$  mutations and the pathogenic mutations for the gene are denoted as  $M_{\text{all}}$  and  $M_{\text{pa}}$ , respectively.  $M_{\text{pa}}$  is a subset of  $M_{\text{all}}$ . For every possible point mutation,

we compute the *mean* quantum mechanical transmission coefficient  $T_L^{(k)}$  of a subsequence with length  $L$  of the *wild-type* gene. Here the mean is determined by averaging over all individual transmission coefficients  $T_{j,L}$  with  $j = k - L + 1, k - L + 2, \dots, k$ . In this way, the influence of the full neighborhood of hotspot  $k$  is taken into account and not just the mutation itself. The results of  $T_L^{(k)}$  for  $k \in M_{pa}$  already show some signatures of atypical CT response for the 1D model.<sup>S41</sup> However, the signal is much less pronounced in the 2-leg model. Hence we study the *difference* in CT between a healthy DNA base and the 3 possible mutations. For example the hotspot 14585 of *p53* contains the correct *C/G* base pair in the wild but of the three possible mutations  $C/G \rightarrow G/C$ ,  $C/G \rightarrow A/T$  and  $C/G \rightarrow T/A$  only the last one is known to lead to cancer.<sup>5</sup> Averaging again over all incident energies and subsequences of length  $L$  containing the hotspot  $(k, s)$ , we can characterize the *average change* in CT as

$$\Gamma_{L,q}^{(k,s)} = \frac{1}{L} \sum_{j=k-L+1}^k \int_{E_0}^{E_1} \frac{|T_{j,L}(E) - T_{j,L}^{(k,s)}(E)|^q}{E_1 - E_0} dE \quad . \quad (3)$$

with  $q = 1$  or  $2$ . We find that results for  $q = 1$  and  $2$  are similar. Hence in the manuscript we restrict our discussion to  $q = 2$ . We calculate such  $\Gamma$  estimates for all possible  $3\mathcal{N}$  mutations of each gene and compare the probability distribution of CT change  $\Gamma_{L,q}^{(k,s)}$  for  $(k, s) \in M_{all}$  and  $(k, s) \in M_{pa}$  for each gene. The result for the *p16* gene was shown in Fig. (a) as an example. As a control group, we also shuffled the *p16* sequence randomly under the conditions that (1) the contents of the 4 bases are not changed, and (2) the positions of the mutations can be moved but the numbers of the 12 types of mutations are not changed. The distributions of the averaged  $\Gamma$  for 1D and 2-leg models with  $L = 40$  of the 20 shuffled sequences are shown in Fig. S1. It is clear that the distributions of  $\Gamma$  for the  $M_{all}$  and  $M_{pa}$  are almost identical.

## CT Change for the 12 Type of Mutations

The comparison of  $\Gamma$  between the pathogenic and all possible mutations for the 12 types of point mutations is shown in Fig. S2. It is clear for the 1D model (a-l)  $\Gamma$  tends to be smaller for the pathogenic mutations. However, the difference is not visible for the 2-leg model (m-x).

## Local ranking of point mutations at hotspot sites

In order to study the local effects of pathogenic mutations on CT, we compare  $\Gamma_{L,2}^{(k,s)}$  of each pathogenic mutation  $(k, s)$  with the other two non-pathogenic ones at the same position  $k$  and determine the *local ranking* (LR) of CT change for  $(k, s)$ . There are three possibilities of LR, namely *low*, *medium* and *high*. Note that those hotspots  $k$  with more than one pathogenic mutations are excluded in the LR analysis. As an example, percentages of the three LR for the pathogenic mutations of *p16* are shown in the top panels of Fig. S3. The rankings of pathogenic mutations with low CT change are evidently larger than the medium and high ones for most  $L$ . A similar tendency is observed for *CYP21A2*. Let us again ask how significant this tendency is across all 162 genes. Figure S4 shows similar ranking analysis results as in Fig. S3 but now for *all*  $M_{\text{pa}}$ . We see that the tendency towards low CT change in the pathogenic mutations is quite strong overall. In Fig. we have sorted the LR ranking for each gene according to prevalence. We find that for  $L = 20, 40$  and  $60$  the low CT change corresponds to 155 (95%), 148 (91%) and 140 (86%) of all 162 genes with pathogenic mutations. Note that similarly consistent is the result for large CT with only about 30 of all genes having high CT change.

## Global CT rankings at hotspot sites

Another way to compare the CT change is a *global* ranking (GR). We have sorted the CT change  $\Gamma_{L,2}^{(k,s)}$  for *all* possible  $3\mathcal{N}$  mutations of a gene with  $\mathcal{N}$  bps in order to get a ranking of *every* pathogenic mutation  $(k, s)$ . By dividing each ranking by  $3\mathcal{N}$  we compute the normalised GR  $\gamma_{L,2}^{(k,s)}$  of the mutation with values between 0 and 1. As before for  $\Gamma_{L,q}^{(k,s)}$ , smaller values of  $\gamma_{L,q}^{(k,s)}$  mean smaller CT change. To characterise the CT change in a quantitative way, we divide the  $\gamma_{L,2}^{(k,s)}$  of the pathogenic mutations into again three groups as before, i.e. low ( $\gamma < 33.3\%$ ), medium ( $33.3\% \leq \gamma < 66.7\%$ ), and high ( $\gamma \geq 66.7\%$ ) CT change. The distributions of the GR for the complete set of pathogenic mutations of *p16* and *CYP21A2* is shown in Fig. S3 as an example. As for the LR results, the pathogenic genes lead to many  $\gamma_{L,2}^{(k,s)}$  values with low CT change. This is most pronounced in the 1D model as shown in Fig. S3(c). The results of the GR for the 162 genes are shown in the bottom row (c) and (d) of Figs. S4 and . We see that the GR results are fully consistent with the LR rankings.

## Consistency of CT rankings for all DNA sequences

The prevalence ordering as shown in Fig. does not imply that the order of the genes themselves is the same in all parts (a), (b), (c) and (d) of the figure. Therefore we have calculated the correlations in the ordering and found that in both models and across models and for all  $L = 20, 40$  and  $60$ , we find positive correlation coefficients. Hence genes which have a low change in CT for, e.g., the local ranking at  $L = 20$ , also retain this low rank for the other  $L$  values as well as the global

ranking. Similarly, this positive correlations implies that in those few case where the mutations in a gene lead to high CT change, they do so across all local as well as global rankings. This confirms that our results are internally consistent.

We graphically summarise the results for all 162 disease-related genes in Fig. S5. For each gene, we have shown a positive deviation from the 0.33 line by orange —supporting the scenario of small CT change for pathogenic mutations — and by blue when the results seem to show no or negative indication with CT change. The criteria corresponds to local and global ranking results for  $L = 20, 40$  and  $60$  for the 1D and the 2-leg models. Similarly, in Fig. , we average of all 12 criteria and show the resulting, overall agreement with the CT hypothesis: 161 of 162 genes are above the 33% line and hence show that for both 1D and 2-leg model and averaged over lengths 20, 40 and 60, a small CT change correlates with the existence and position of pathogenic mutations. Only for STK11 do we see that there is no overall agreement.

### **Difference and similarities in the two models**

The 2-leg model<sup>16</sup> allows inter-strand coupling between the purine bases in successive base pairs, in accordance with electronic structure calculations,<sup>39</sup> and should therefore be a better model for bulk charge transport along the DNA double helix; the 1D model, by contrast, makes use of the site energies of only the bases on the coding strand,<sup>15</sup> and so is most representative of the electronic environment along that strand. We also find that the 2-leg model recovers some of the coding strand dependence of the 1D model upon decreasing the diagonal hoppings. For 28 genes, we find

that reducing only the diagonal hopping elements by  $1/2$  leads to a much greater agreement with the 1D results similar to Fig. (c).

S41. Shih, C. T. Characteristic length scale of electric transport properties of genomes. *Phys. Rev. E* **74**, 010903(R) (2006).

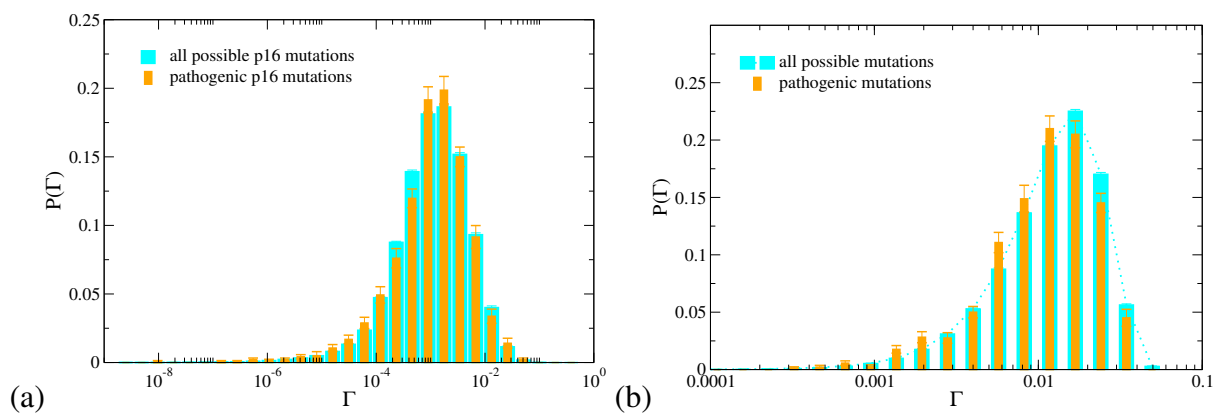

Figure S1: (Supplementary) Distribution of the change in charge transport in (a) 1D and (b) 2-leg models  $\Gamma$  for pathogenic (orange bars) and all possible (cyan bars) mutations averaged for the 20 shuffled *p16* (CDKN2A) DNA strands with 26740 base pairs. All results shown are for  $L = 40$ , data for  $L = 20$  and 60 are similar.

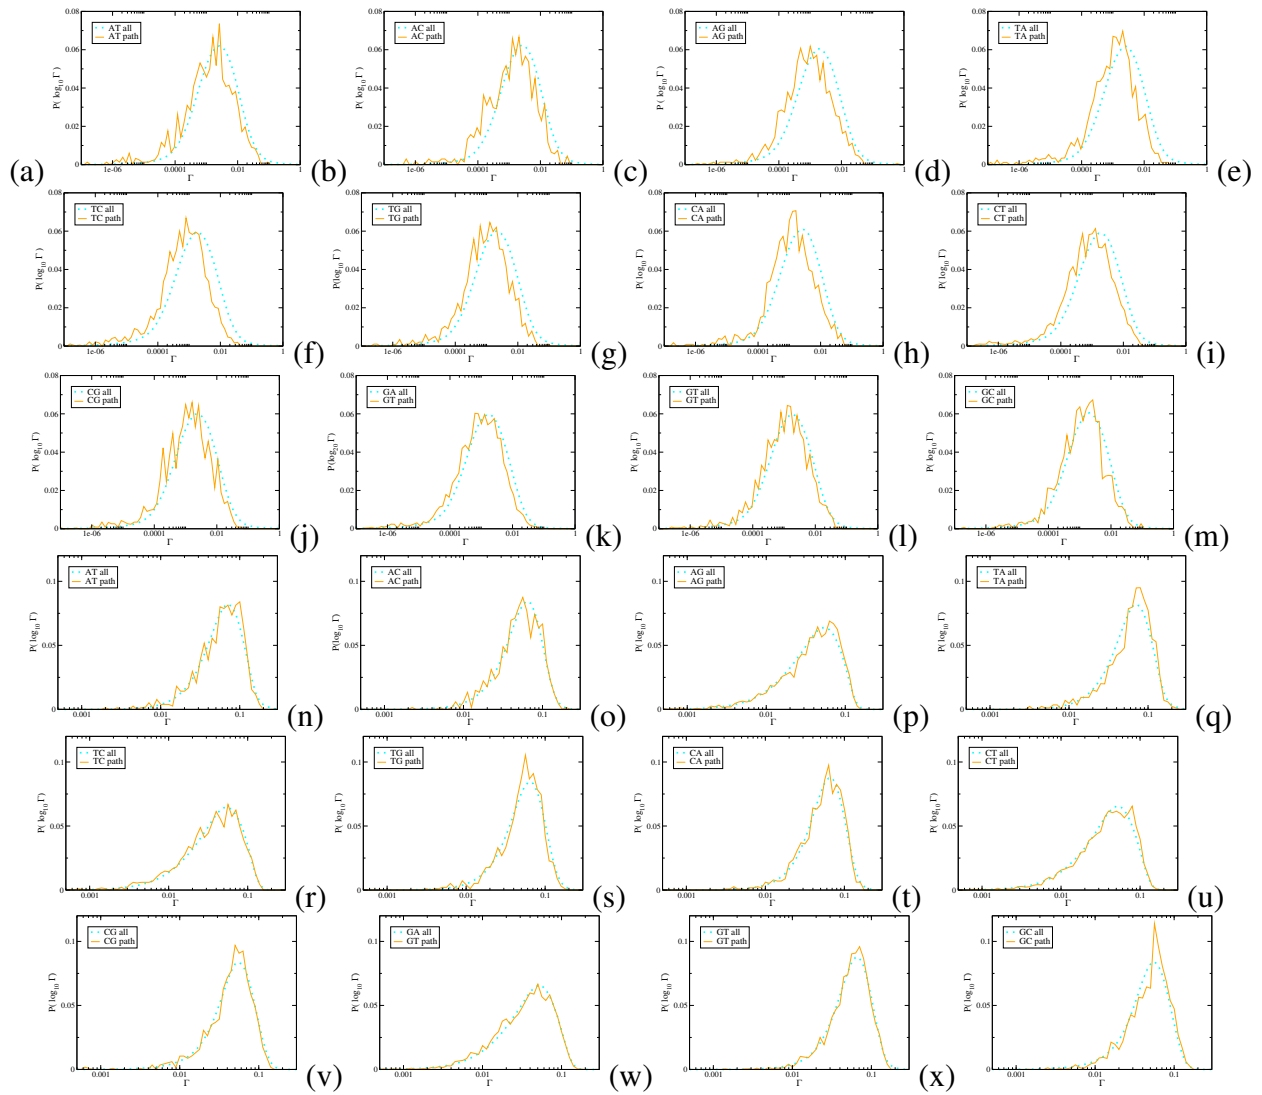

Figure S2: (Supplementary) Panels a-l: 1D model, results divided into the twelve subtypes of mutation. The shift for pathogenic mutations is clearly present in every case. Panels m-x: 2-leg model, results divided into the twelve subtypes of mutation. There is no consistent shift for pathogenic mutations.



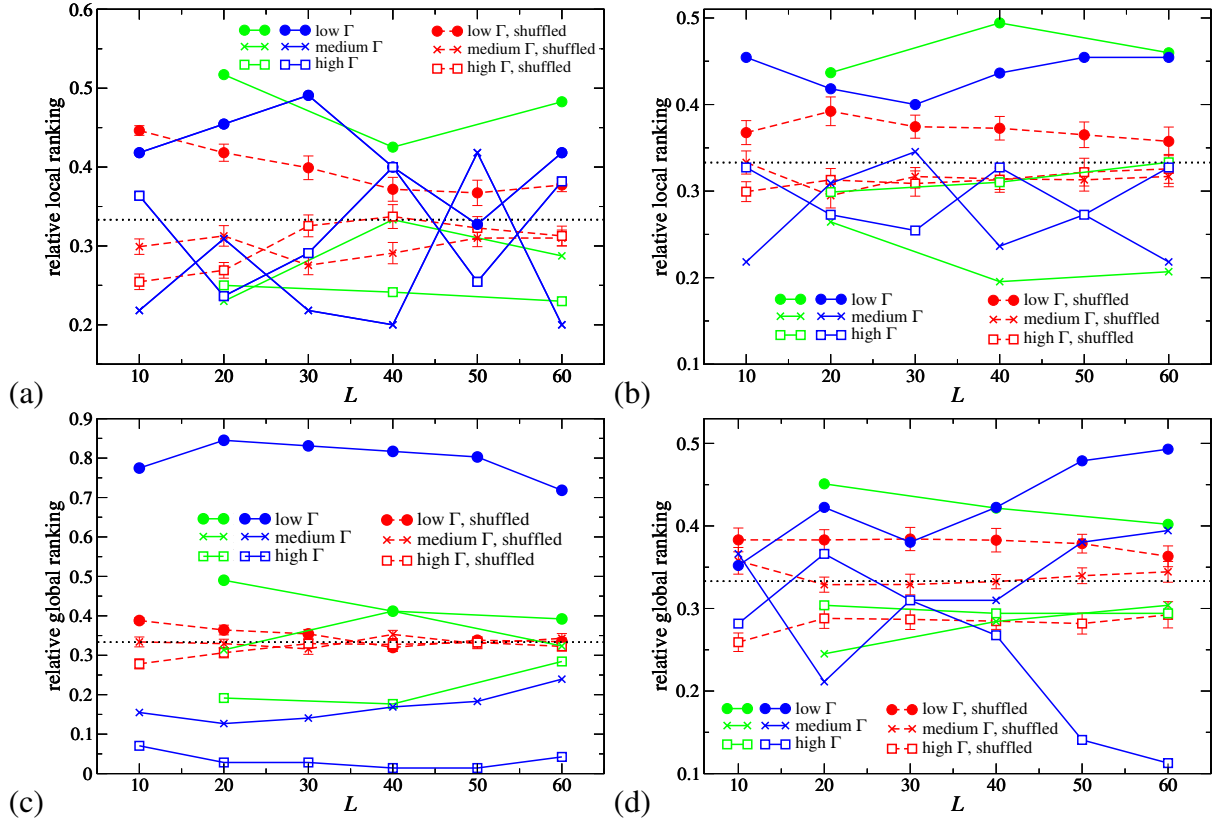

Figure S3: (Supplementary) Distribution of the *local* (a+b) and *global* (c+d) ranking results of pathogenic mutations of *p16* (CDKN2A) (blue solid lines) and *CYP21A2* (green) as a function of window lengths  $L$ . The dashed lines indicate averaged results for 20 randomly shuffled *p16* sequences. The left/right columns distinguish results for the 1D/2-leg models. The dashed horizontal line shows the 33% mark expected for a completely random sequence. All lines are guides to the eyes only. Error bars are within symbol size.

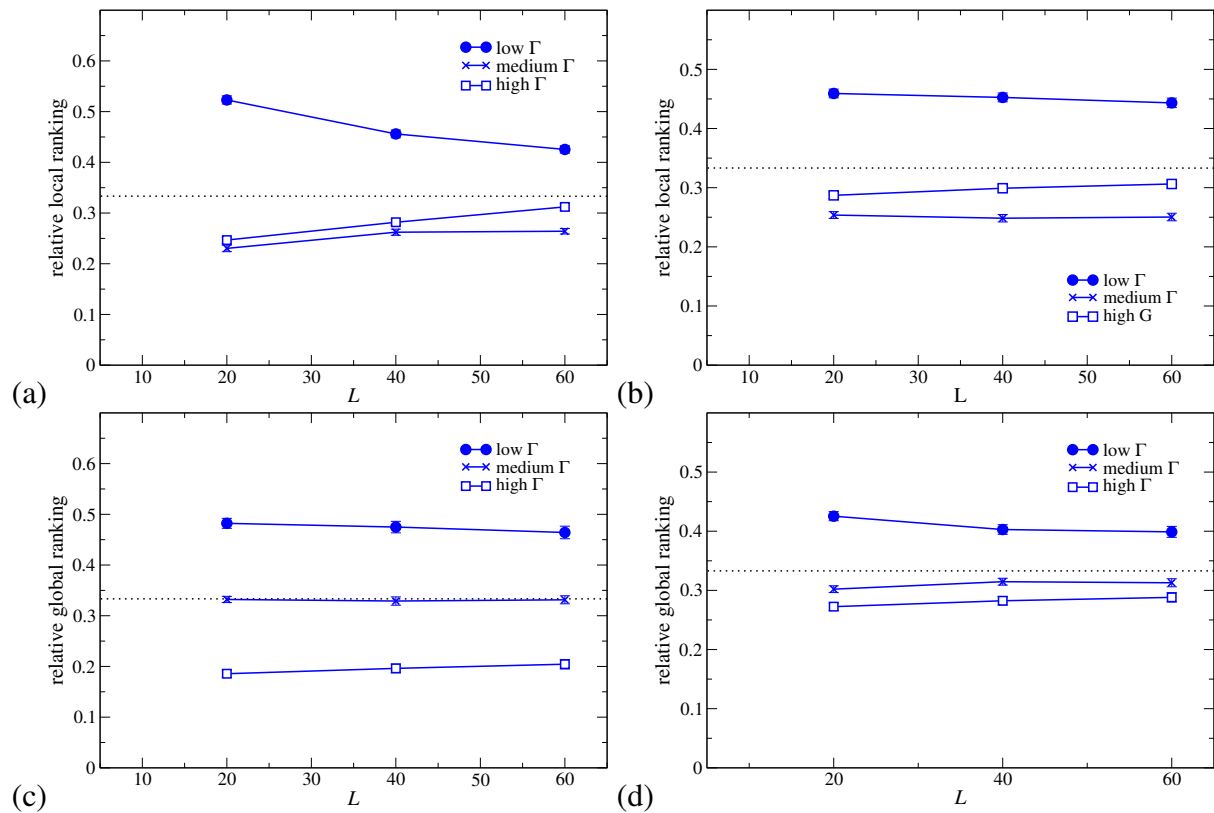

Figure S4: (Supplementary) Distribution of the *local* (a+b) and *global* (c+d) ranking results of *all* 19882 pathogenic mutations of the 162 genes as a function of window lengths  $L$ . The left/right columns distinguish results for the 1D/2-leg models. The dashed horizontal lines show the 33% mark of a completely random sequence. All lines are guides to the eyes only.

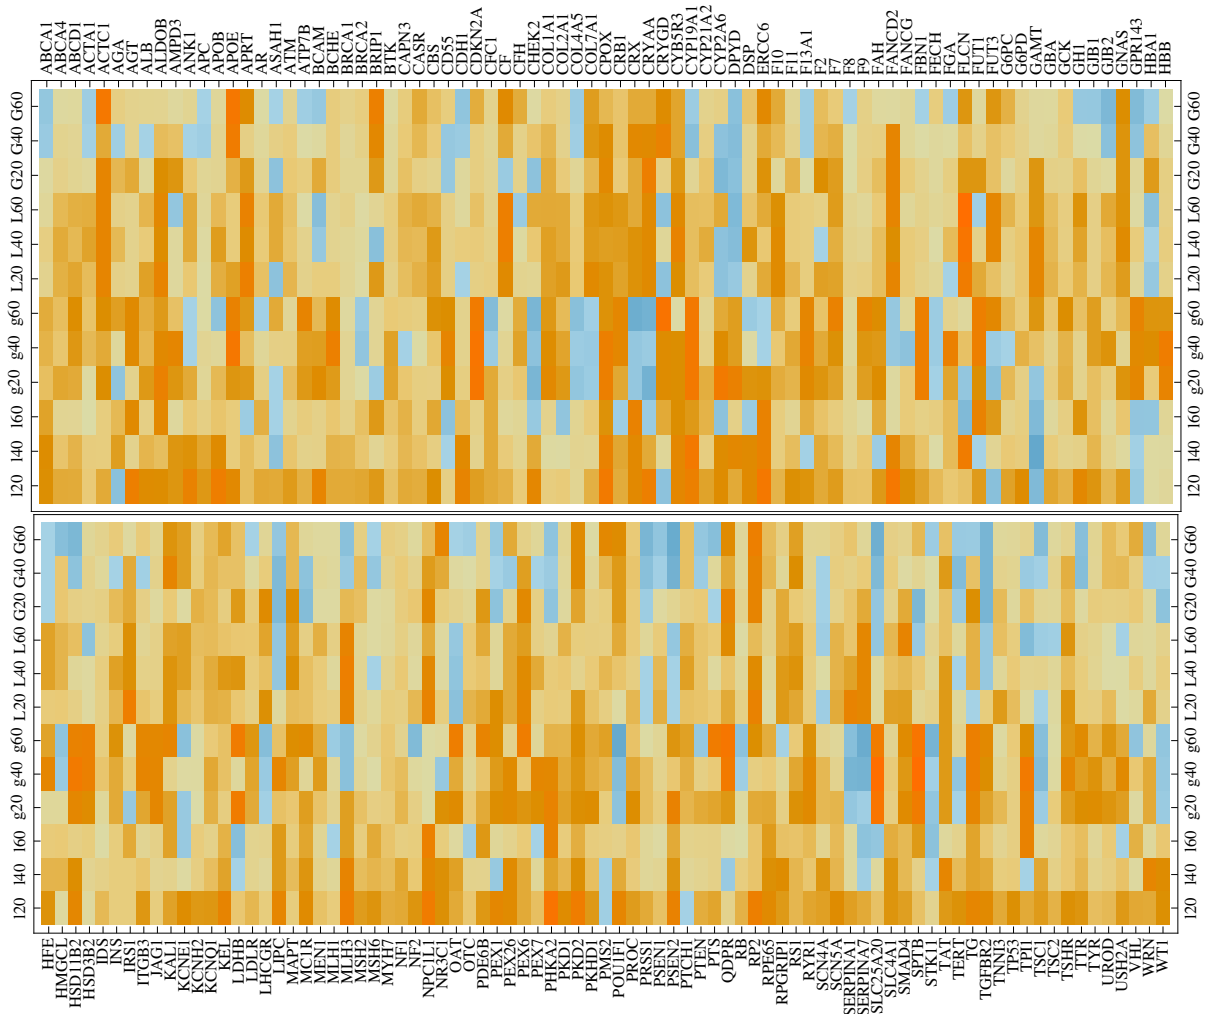

Figure S5: (Supplementary) Numerical representation of the 12 criteria for all 162 genes, i.e. deviation from the 0.33 line for the *local* rankings ( $l_i, L_i$ ) and the *global* rankings ( $g_i, G_i$ ) corresponding to the sorted prevalence for  $L = 20, 40$  and  $60$ , respectively. The lower case ( $l, g$ ) indicates results for the 1D model, uppercase ( $L, G$ ) refers to the 2-leg model. The genes are named according to the usage in the DNA databases.<sup>3-6</sup> The orange shading corresponds to an agreement with the CT hypothesis while the blue shading denotes disagreement. The first (last) column in the top (bottom) row gives the scale from 0 to 1 with 0.33 corresponding to the white square.

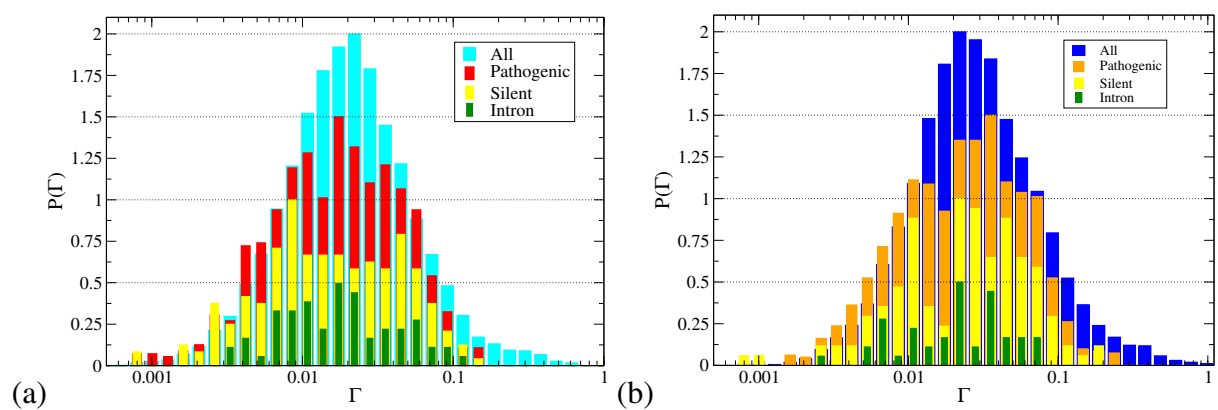

Figure S6: Histograms of  $\Gamma$  distributions for (a) transitions and (b) transversions in TP53, simulated using the 1D model and  $L = 20$ . Histograms are shown for all possible mutations and for pathogenic, silent and intronic subsets. The maximum heights of the populations are scaled to be 2, 1.5, 1 and 0.5 to ease comparison. The scales factors are indicated by the dotted horizontal lines.

Table S1: (Supplementary) List of the 162 genes with their lengths (bps), number of all point mutations ( $N_{pa}$ ), and their numbers of the 12 types of point mutations. For example,  $N_{At}$  means the number of  $A \rightarrow T$  substitution.

| Name  | Length | $N_{pa}$ | $N_{At}$ | $N_{Ac}$ | $N_{Ag}$ | $N_{Ta}$ | $N_{Tc}$ | $N_{Tg}$ | $N_{Ca}$ | $N_{Ct}$ | $N_{Cg}$ | $N_{Ga}$ | $N_{Gt}$ | $N_{Gc}$ |
|-------|--------|----------|----------|----------|----------|----------|----------|----------|----------|----------|----------|----------|----------|----------|
| ABCA1 | 147154 | 87       | 0        | 4        | 9        | 2        | 7        | 2        | 4        | 24       | 3        | 18       | 7        | 7        |
| ABCA4 | 128313 | 382      | 11       | 9        | 21       | 13       | 51       | 21       | 27       | 73       | 19       | 99       | 23       | 15       |
| ABCD1 | 19894  | 223      | 8        | 7        | 14       | 6        | 31       | 3        | 15       | 46       | 17       | 47       | 13       | 16       |
| ACTA1 | 2852   | 164      | 10       | 7        | 22       | 5        | 13       | 6        | 13       | 12       | 11       | 29       | 17       | 19       |
| ACTC1 | 7631   | 14       | 0        | 1        | 3        | 0        | 0        | 0        | 0        | 4        | 1        | 2        | 1        | 2        |
| AGA   | 11668  | 19       | 0        | 0        | 0        | 1        | 3        | 1        | 0        | 2        | 0        | 8        | 2        | 2        |
| AGT   | 11673  | 10       | 0        | 0        | 1        | 0        | 1        | 1        | 0        | 5        | 0        | 1        | 0        | 1        |
| ALB   | 17127  | 63       | 3        | 2        | 13       | 2        | 1        | 0        | 1        | 6        | 1        | 24       | 4        | 6        |
| ALDOB | 14448  | 28       | 0        | 0        | 0        | 1        | 9        | 1        | 3        | 5        | 3        | 3        | 1        | 2        |
| AMPD3 | 56903  | 11       | 0        | 1        | 0        | 1        | 1        | 0        | 0        | 6        | 1        | 0        | 0        | 1        |
| ANK1  | 144397 | 18       | 0        | 0        | 1        | 0        | 2        | 0        | 1        | 7        | 1        | 4        | 2        | 0        |
| APC   | 108353 | 222      | 10       | 0        | 4        | 18       | 1        | 8        | 21       | 83       | 28       | 18       | 28       | 3        |
| APOB  | 42645  | 51       | 0        | 0        | 2        | 4        | 1        | 1        | 3        | 26       | 2        | 8        | 3        | 1        |
| APOE  | 3612   | 33       | 0        | 1        | 1        | 0        | 2        | 0        | 2        | 9        | 2        | 9        | 2        | 5        |
| APRT  | 2466   | 13       | 2        | 0        | 1        | 0        | 3        | 0        | 0        | 1        | 0        | 4        | 1        | 1        |
| AR    | 180246 | 299      | 11       | 6        | 24       | 11       | 31       | 12       | 22       | 53       | 25       | 56       | 31       | 17       |

| Name   | Length | $N_{pa}$ | $N_{At}$ | $N_{Ac}$ | $N_{Ag}$ | $N_{Ta}$ | $N_{Tc}$ | $N_{Tg}$ | $N_{Ca}$ | $N_{Ct}$ | $N_{Cg}$ | $N_{Ga}$ | $N_{Gt}$ | $N_{Gc}$ |
|--------|--------|----------|----------|----------|----------|----------|----------|----------|----------|----------|----------|----------|----------|----------|
| ASAH1  | 28574  | 12       | 1        | 0        | 3        | 1        | 0        | 0        | 1        | 0        | 3        | 1        | 0        | 2        |
| ATM    | 146268 | 169      | 8        | 3        | 20       | 9        | 11       | 15       | 5        | 55       | 10       | 19       | 8        | 6        |
| ATP7B  | 78826  | 315      | 10       | 14       | 25       | 14       | 27       | 10       | 17       | 62       | 16       | 68       | 30       | 22       |
| BCAM   | 12341  | 14       | 1        | 0        | 1        | 1        | 0        | 0        | 1        | 4        | 1        | 5        | 0        | 0        |
| BCHE   | 64562  | 58       | 6        | 2        | 6        | 3        | 6        | 3        | 2        | 12       | 0        | 8        | 5        | 5        |
| BRCA1  | 81155  | 301      | 12       | 6        | 30       | 14       | 29       | 23       | 12       | 63       | 15       | 38       | 50       | 9        |
| BRCA2  | 84193  | 162      | 12       | 9        | 20       | 8        | 11       | 8        | 12       | 33       | 13       | 15       | 19       | 2        |
| BRIP1  | 180771 | 13       | 1        | 0        | 0        | 0        | 1        | 1        | 0        | 3        | 2        | 2        | 1        | 2        |
| BTK    | 36741  | 329      | 15       | 14       | 29       | 19       | 47       | 23       | 26       | 44       | 14       | 48       | 32       | 18       |
| CAPN3  | 64215  | 213      | 2        | 9        | 18       | 5        | 23       | 6        | 10       | 45       | 19       | 48       | 14       | 14       |
| CASR   | 102813 | 144      | 2        | 5        | 12       | 4        | 21       | 7        | 8        | 20       | 10       | 38       | 12       | 5        |
| CBS    | 23121  | 107      | 2        | 1        | 6        | 4        | 10       | 0        | 4        | 24       | 7        | 39       | 2        | 8        |
| CD55   | 38983  | 14       | 0        | 0        | 1        | 2        | 0        | 1        | 0        | 4        | 0        | 3        | 1        | 2        |
| CDH1   | 98250  | 30       | 0        | 1        | 2        | 0        | 2        | 2        | 0        | 9        | 1        | 8        | 4        | 1        |
| CDKN2A | 26740  | 71       | 1        | 3        | 4        | 2        | 6        | 6        | 5        | 12       | 3        | 11       | 8        | 10       |
| CFC1   | 6748   | 10       | 0        | 0        | 0        | 0        | 1        | 0        | 0        | 4        | 1        | 4        | 0        | 0        |
| CF     | 188699 | 828      | 35       | 31       | 103      | 50       | 85       | 54       | 47       | 117      | 41       | 136      | 84       | 45       |
| CFH    | 95494  | 83       | 3        | 3        | 8        | 6        | 10       | 5        | 2        | 10       | 6        | 14       | 13       | 3        |
| CHEK2  | 54092  | 20       | 1        | 1        | 2        | 0        | 1        | 0        | 2        | 4        | 0        | 7        | 1        | 1        |
| COL1A1 | 17544  | 292      | 0        | 2        | 2        | 0        | 1        | 2        | 1        | 21       | 4        | 134      | 79       | 46       |
| COL2A1 | 31538  | 124      | 0        | 1        | 2        | 1        | 1        | 1        | 5        | 26       | 0        | 53       | 19       | 15       |

| Name    | Length | $N_{pa}$ | $N_{At}$ | $N_{Ac}$ | $N_{Ag}$ | $N_{Ta}$ | $N_{Tc}$ | $N_{Tg}$ | $N_{Ca}$ | $N_{Ct}$ | $N_{Cg}$ | $N_{Ga}$ | $N_{Gt}$ | $N_{Gc}$ |
|---------|--------|----------|----------|----------|----------|----------|----------|----------|----------|----------|----------|----------|----------|----------|
| COL4A5  | 257622 | 244      | 2        | 0        | 4        | 2        | 2        | 5        | 4        | 20       | 1        | 117      | 55       | 32       |
| COL7A1  | 31088  | 265      | 0        | 3        | 6        | 2        | 1        | 0        | 1        | 56       | 7        | 122      | 34       | 33       |
| CPOX    | 14152  | 36       | 0        | 2        | 1        | 0        | 3        | 1        | 0        | 14       | 2        | 9        | 3        | 1        |
| CRB1    | 210178 | 91       | 3        | 1        | 2        | 8        | 16       | 7        | 3        | 11       | 2        | 22       | 11       | 5        |
| CRX     | 21483  | 18       | 0        | 1        | 1        | 0        | 0        | 1        | 2        | 4        | 0        | 8        | 0        | 1        |
| CRYAA   | 3773   | 10       | 0        | 0        | 0        | 0        | 0        | 0        | 1        | 5        | 0        | 3        | 1        | 0        |
| CRYGD   | 2882   | 12       | 0        | 1        | 0        | 0        | 0        | 0        | 4        | 3        | 1        | 2        | 1        | 0        |
| CYB5R3  | 30587  | 35       | 0        | 0        | 3        | 0        | 6        | 2        | 2        | 12       | 0        | 10       | 0        | 0        |
| CYP19A1 | 129126 | 13       | 0        | 0        | 0        | 0        | 2        | 1        | 0        | 5        | 0        | 5        | 0        | 0        |
| CYP21A2 | 3338   | 102      | 4        | 4        | 5        | 7        | 8        | 4        | 6        | 23       | 2        | 25       | 4        | 10       |
| CYP2A6  | 6897   | 12       | 1        | 0        | 1        | 1        | 2        | 0        | 0        | 2        | 0        | 2        | 2        | 1        |
| DPYD    | 843317 | 34       | 2        | 3        | 7        | 2        | 0        | 1        | 2        | 7        | 0        | 5        | 4        | 1        |
| DSP     | 45077  | 20       | 0        | 0        | 2        | 1        | 1        | 1        | 0        | 6        | 1        | 6        | 1        | 1        |
| ERCC6   | 80364  | 18       | 1        | 0        | 2        | 1        | 1        | 1        | 0        | 10       | 1        | 1        | 0        | 0        |
| F10     | 26731  | 81       | 1        | 4        | 5        | 1        | 6        | 2        | 4        | 11       | 3        | 33       | 5        | 6        |
| F11     | 23718  | 131      | 2        | 5        | 6        | 3        | 17       | 3        | 9        | 28       | 2        | 29       | 13       | 14       |
| F13A1   | 176614 | 55       | 1        | 0        | 2        | 0        | 6        | 4        | 4        | 12       | 3        | 14       | 8        | 1        |
| F2      | 20301  | 42       | 0        | 3        | 3        | 0        | 1        | 1        | 0        | 11       | 1        | 17       | 3        | 2        |
| F7      | 14891  | 164      | 4        | 1        | 13       | 1        | 17       | 4        | 9        | 30       | 6        | 55       | 13       | 11       |
| F8      | 186936 | 1168     | 79       | 47       | 124      | 56       | 117      | 78       | 55       | 153      | 72       | 198      | 112      | 77       |
| F9      | 32723  | 707      | 31       | 26       | 55       | 58       | 69       | 52       | 42       | 54       | 28       | 135      | 95       | 62       |

| Name   | Length | $N_{pa}$ | $N_{At}$ | $N_{Ac}$ | $N_{Ag}$ | $N_{Ta}$ | $N_{Tc}$ | $N_{Tg}$ | $N_{Ca}$ | $N_{Ct}$ | $N_{Cg}$ | $N_{Ga}$ | $N_{Gt}$ | $N_{Gc}$ |
|--------|--------|----------|----------|----------|----------|----------|----------|----------|----------|----------|----------|----------|----------|----------|
| FAH    | 33342  | 26       | 2        | 1        | 2        | 0        | 1        | 3        | 2        | 6        | 0        | 5        | 4        | 0        |
| FANCD2 | 75502  | 14       | 0        | 0        | 0        | 0        | 3        | 3        | 0        | 4        | 0        | 4        | 0        | 0        |
| FANCG  | 6179   | 16       | 0        | 0        | 0        | 0        | 2        | 1        | 0        | 7        | 0        | 2        | 2        | 2        |
| FBN1   | 237414 | 640      | 18       | 12       | 52       | 32       | 88       | 37       | 21       | 63       | 32       | 173      | 68       | 44       |
| FECH   | 38454  | 49       | 2        | 1        | 2        | 3        | 7        | 3        | 1        | 11       | 1        | 11       | 4        | 3        |
| FGA    | 7618   | 45       | 3        | 1        | 3        | 3        | 1        | 2        | 3        | 12       | 2        | 7        | 7        | 1        |
| FLCN   | 24971  | 11       | 0        | 0        | 1        | 0        | 0        | 0        | 0        | 4        | 2        | 3        | 1        | 0        |
| FUT1   | 7380   | 22       | 0        | 0        | 1        | 2        | 2        | 1        | 2        | 5        | 1        | 4        | 1        | 3        |
| FUT3   | 8587   | 11       | 0        | 0        | 0        | 1        | 0        | 2        | 2        | 0        | 0        | 5        | 0        | 1        |
| G6PC   | 12572  | 66       | 2        | 2        | 3        | 2        | 8        | 3        | 3        | 13       | 2        | 15       | 5        | 8        |
| G6PD   | 16182  | 163      | 3        | 3        | 21       | 4        | 15       | 4        | 8        | 27       | 15       | 39       | 13       | 11       |
| GAMT   | 4465   | 11       | 0        | 2        | 0        | 0        | 1        | 0        | 0        | 1        | 1        | 3        | 1        | 2        |
| GBA    | 10246  | 259      | 8        | 11       | 25       | 8        | 32       | 19       | 14       | 42       | 10       | 53       | 19       | 18       |
| GCK    | 45153  | 255      | 5        | 13       | 15       | 7        | 32       | 8        | 19       | 40       | 11       | 64       | 23       | 18       |
| GH1    | 1636   | 35       | 2        | 2        | 7        | 0        | 3        | 1        | 1        | 5        | 2        | 7        | 3        | 2        |
| GJB1   | 10004  | 240      | 4        | 5        | 25       | 18       | 31       | 12       | 10       | 39       | 24       | 39       | 17       | 16       |
| GJB2   | 5513   | 208      | 8        | 9        | 19       | 5        | 28       | 8        | 12       | 23       | 15       | 49       | 19       | 13       |
| GNAS   | 71456  | 51       | 2        | 2        | 2        | 1        | 6        | 2        | 1        | 17       | 4        | 9        | 3        | 2        |
| GPR143 | 40464  | 43       | 2        | 0        | 3        | 2        | 4        | 3        | 4        | 6        | 1        | 10       | 4        | 4        |
| HBA1   | 842    | 73       | 2        | 5        | 9        | 2        | 5        | 2        | 7        | 6        | 9        | 8        | 7        | 11       |
| HBB    | 1606   | 263      | 15       | 20       | 20       | 21       | 23       | 16       | 22       | 26       | 18       | 38       | 20       | 24       |



| Name    | Length | $N_{pa}$ | $N_{At}$ | $N_{Ac}$ | $N_{Ag}$ | $N_{Ta}$ | $N_{Tc}$ | $N_{Tg}$ | $N_{Ca}$ | $N_{Ct}$ | $N_{Cg}$ | $N_{Ga}$ | $N_{Gt}$ | $N_{Gc}$ |
|---------|--------|----------|----------|----------|----------|----------|----------|----------|----------|----------|----------|----------|----------|----------|
| HFE     | 9612   | 27       | 1        | 2        | 0        | 0        | 4        | 1        | 0        | 3        | 2        | 7        | 3        | 4        |
| HMGCL   | 23583  | 27       | 2        | 0        | 2        | 0        | 3        | 1        | 1        | 4        | 1        | 8        | 3        | 2        |
| HSD11B2 | 6421   | 24       | 1        | 0        | 1        | 0        | 3        | 2        | 1        | 12       | 1        | 3        | 0        | 0        |
| HSD3B2  | 7879   | 32       | 0        | 1        | 1        | 1        | 2        | 3        | 3        | 8        | 3        | 6        | 2        | 2        |
| IDS     | 26493  | 203      | 15       | 8        | 15       | 2        | 16       | 13       | 17       | 31       | 19       | 32       | 20       | 15       |
| INS     | 1431   | 30       | 0        | 0        | 2        | 0        | 3        | 2        | 1        | 3        | 6        | 6        | 4        | 3        |
| IRS1    | 64538  | 14       | 0        | 1        | 3        | 0        | 1        | 0        | 1        | 2        | 1        | 3        | 0        | 2        |
| ITGB3   | 58870  | 53       | 2        | 2        | 3        | 1        | 10       | 4        | 1        | 12       | 1        | 11       | 5        | 1        |
| JAG1    | 36257  | 131      | 2        | 0        | 3        | 6        | 11       | 6        | 11       | 30       | 12       | 28       | 16       | 6        |
| KAL1    | 203313 | 25       | 0        | 0        | 1        | 2        | 1        | 1        | 1        | 9        | 2        | 6        | 1        | 1        |
| KCNE1   | 65586  | 17       | 0        | 0        | 1        | 0        | 2        | 0        | 1        | 5        | 0        | 6        | 1        | 1        |
| KCNH2   | 32966  | 266      | 8        | 11       | 27       | 5        | 19       | 12       | 15       | 61       | 9        | 43       | 35       | 21       |
| KCNQ1   | 404120 | 226      | 3        | 2        | 19       | 8        | 24       | 5        | 12       | 44       | 13       | 61       | 11       | 24       |
| KEL     | 21303  | 33       | 2        | 0        | 3        | 1        | 3        | 0        | 0        | 9        | 1        | 13       | 0        | 1        |
| LDHB    | 22501  | 11       | 1        | 1        | 1        | 0        | 1        | 2        | 1        | 1        | 0        | 2        | 0        | 1        |
| LDLR    | 44450  | 741      | 23       | 31       | 48       | 31       | 84       | 35       | 51       | 88       | 48       | 168      | 92       | 42       |
| LHCGR   | 68951  | 37       | 2        | 3        | 3        | 3        | 7        | 3        | 2        | 7        | 1        | 3        | 2        | 1        |
| LIPC    | 136898 | 11       | 0        | 1        | 2        | 0        | 0        | 1        | 0        | 2        | 0        | 4        | 0        | 1        |
| MAPT    | 133924 | 36       | 3        | 2        | 2        | 0        | 3        | 2        | 2        | 6        | 1        | 9        | 5        | 1        |
| MC1R    | 2360   | 24       | 0        | 1        | 1        | 0        | 4        | 0        | 3        | 8        | 0        | 5        | 1        | 1        |
| MEN1    | 7779   | 239      | 10       | 7        | 8        | 9        | 26       | 11       | 19       | 44       | 14       | 38       | 33       | 20       |

| Name   | Length | $N_{pa}$ | $N_{At}$ | $N_{Ac}$ | $N_{Ag}$ | $N_{Ta}$ | $N_{Tc}$ | $N_{Tg}$ | $N_{Ca}$ | $N_{Ct}$ | $N_{Cg}$ | $N_{Ga}$ | $N_{Gt}$ | $N_{Gc}$ |
|--------|--------|----------|----------|----------|----------|----------|----------|----------|----------|----------|----------|----------|----------|----------|
| MLH1   | 57359  | 275      | 16       | 15       | 26       | 18       | 19       | 17       | 18       | 42       | 20       | 36       | 28       | 20       |
| MLH3   | 37769  | 17       | 0        | 1        | 5        | 0        | 1        | 0        | 0        | 2        | 1        | 4        | 2        | 1        |
| MSH2   | 80098  | 238      | 16       | 11       | 25       | 8        | 9        | 14       | 11       | 62       | 14       | 30       | 25       | 13       |
| MSH6   | 23872  | 54       | 3        | 1        | 5        | 2        | 3        | 0        | 3        | 17       | 6        | 7        | 4        | 3        |
| MYH7   | 22924  | 268      | 8        | 10       | 20       | 4        | 19       | 8        | 16       | 47       | 17       | 80       | 16       | 23       |
| NF1    | 282701 | 338      | 22       | 4        | 24       | 20       | 35       | 26       | 14       | 82       | 24       | 44       | 29       | 14       |
| NF2    | 95023  | 72       | 5        | 2        | 5        | 2        | 6        | 1        | 2        | 25       | 4        | 7        | 11       | 2        |
| NPC1L1 | 28781  | 26       | 0        | 0        | 3        | 2        | 0        | 0        | 0        | 11       | 1        | 8        | 1        | 0        |
| NR3C1  | 157582 | 14       | 1        | 0        | 1        | 1        | 4        | 1        | 0        | 1        | 0        | 4        | 0        | 1        |
| OAT    | 21580  | 42       | 0        | 0        | 2        | 2        | 4        | 0        | 3        | 9        | 2        | 11       | 5        | 4        |
| OTC    | 68968  | 276      | 16       | 11       | 28       | 9        | 31       | 18       | 17       | 36       | 15       | 44       | 27       | 24       |
| PDE6B  | 45199  | 20       | 1        | 0        | 0        | 3        | 3        | 1        | 2        | 5        | 1        | 4        | 0        | 0        |
| PEX1   | 41509  | 24       | 0        | 0        | 0        | 0        | 4        | 1        | 2        | 7        | 3        | 6        | 0        | 1        |
| PEX26  | 11503  | 10       | 0        | 0        | 0        | 0        | 3        | 0        | 0        | 3        | 2        | 2        | 0        | 0        |
| PEX6   | 15143  | 18       | 0        | 1        | 0        | 0        | 3        | 1        | 1        | 7        | 0        | 5        | 0        | 0        |
| PEX7   | 91337  | 24       | 1        | 2        | 2        | 1        | 1        | 3        | 2        | 6        | 1        | 4        | 1        | 0        |
| PHKA2  | 91305  | 23       | 0        | 1        | 2        | 0        | 0        | 1        | 1        | 11       | 0        | 5        | 2        | 0        |
| PKD1   | 47189  | 149      | 2        | 3        | 6        | 5        | 12       | 4        | 8        | 59       | 10       | 27       | 8        | 5        |
| PKD2   | 70110  | 35       | 1        | 0        | 1        | 1        | 1        | 1        | 2        | 17       | 0        | 7        | 3        | 1        |
| PKHD1  | 472279 | 213      | 8        | 10       | 22       | 7        | 29       | 9        | 7        | 50       | 7        | 38       | 17       | 9        |
| PMS2   | 35868  | 21       | 3        | 1        | 1        | 1        | 0        | 0        | 0        | 6        | 0        | 5        | 4        | 0        |

| Name     | Length | $N_{pa}$ | $N_{At}$ | $N_{Ac}$ | $N_{Ag}$ | $N_{Ta}$ | $N_{Tc}$ | $N_{Tg}$ | $N_{Ca}$ | $N_{Ct}$ | $N_{Cg}$ | $N_{Ga}$ | $N_{Gt}$ | $N_{Gc}$ |
|----------|--------|----------|----------|----------|----------|----------|----------|----------|----------|----------|----------|----------|----------|----------|
| POU1F1   | 16954  | 22       | 1        | 0        | 2        | 1        | 3        | 1        | 1        | 6        | 0        | 4        | 2        | 1        |
| PROC     | 10802  | 203      | 6        | 6        | 10       | 3        | 21       | 6        | 15       | 40       | 8        | 55       | 13       | 20       |
| PRSS1    | 3592   | 26       | 1        | 2        | 2        | 2        | 2        | 0        | 2        | 5        | 1        | 5        | 2        | 2        |
| PSEN1    | 83931  | 154      | 6        | 8        | 13       | 8        | 22       | 11       | 7        | 21       | 12       | 19       | 16       | 11       |
| PSEN2    | 25532  | 18       | 2        | 2        | 3        | 0        | 0        | 0        | 0        | 5        | 1        | 5        | 0        | 0        |
| PTCH1    | 73984  | 59       | 3        | 2        | 1        | 2        | 4        | 2        | 7        | 15       | 2        | 11       | 8        | 2        |
| PTEN     | 105338 | 98       | 2        | 2        | 10       | 9        | 13       | 11       | 5        | 15       | 8        | 15       | 6        | 2        |
| PTS      | 7595   | 27       | 1        | 0        | 8        | 1        | 0        | 2        | 0        | 6        | 2        | 4        | 2        | 1        |
| QDPR     | 57702  | 20       | 0        | 1        | 2        | 0        | 3        | 3        | 0        | 3        | 0        | 6        | 1        | 1        |
| RB       | 180388 | 226      | 9        | 8        | 18       | 12       | 16       | 11       | 10       | 38       | 8        | 51       | 28       | 17       |
| RP2      | 45418  | 17       | 0        | 0        | 1        | 0        | 1        | 2        | 0        | 5        | 2        | 4        | 2        | 0        |
| RPE65    | 21136  | 42       | 1        | 1        | 2        | 1        | 5        | 3        | 3        | 9        | 1        | 7        | 7        | 2        |
| RPGRIP1  | 63325  | 24       | 0        | 2        | 5        | 1        | 0        | 0        | 0        | 7        | 0        | 5        | 3        | 1        |
| RS1      | 32422  | 93       | 3        | 0        | 7        | 5        | 11       | 4        | 5        | 15       | 5        | 19       | 7        | 12       |
| RYR1     | 153865 | 244      | 5        | 4        | 21       | 9        | 20       | 6        | 10       | 56       | 14       | 63       | 17       | 19       |
| SCN4A    | 34365  | 43       | 1        | 0        | 5        | 2        | 3        | 1        | 4        | 7        | 3        | 12       | 2        | 3        |
| SCN5A    | 101611 | 226      | 0        | 2        | 18       | 9        | 16       | 6        | 13       | 49       | 10       | 77       | 15       | 11       |
| SERPINA1 | 12332  | 29       | 4        | 1        | 0        | 1        | 2        | 1        | 2        | 8        | 1        | 9        | 0        | 0        |
| SERPINA7 | 3870   | 16       | 1        | 0        | 0        | 2        | 1        | 0        | 1        | 4        | 0        | 5        | 1        | 1        |
| SLC25A20 | 41966  | 11       | 0        | 0        | 1        | 0        | 0        | 0        | 0        | 4        | 1        | 3        | 1        | 1        |
| SLC4A1   | 18428  | 65       | 1        | 1        | 3        | 2        | 5        | 0        | 6        | 20       | 4        | 20       | 1        | 2        |

| Name   | Length | $N_{pa}$ | $N_{At}$ | $N_{Ac}$ | $N_{Ag}$ | $N_{Ta}$ | $N_{Tc}$ | $N_{Tg}$ | $N_{Ca}$ | $N_{Ct}$ | $N_{Cg}$ | $N_{Ga}$ | $N_{Gt}$ | $N_{Gc}$ |
|--------|--------|----------|----------|----------|----------|----------|----------|----------|----------|----------|----------|----------|----------|----------|
| SMAD4  | 49535  | 20       | 0        | 1        | 1        | 0        | 0        | 2        | 1        | 6        | 3        | 4        | 1        | 1        |
| SPTB   | 76865  | 18       | 0        | 0        | 2        | 2        | 2        | 2        | 0        | 6        | 1        | 0        | 1        | 2        |
| STK11  | 22637  | 62       | 4        | 4        | 2        | 1        | 4        | 5        | 7        | 12       | 5        | 8        | 8        | 2        |
| TAT    | 10242  | 11       | 0        | 0        | 0        | 0        | 1        | 1        | 0        | 5        | 1        | 2        | 1        | 0        |
| TERT   | 41881  | 30       | 0        | 1        | 3        | 1        | 2        | 0        | 0        | 10       | 3        | 8        | 0        | 2        |
| TG     | 267939 | 33       | 0        | 1        | 2        | 1        | 2        | 1        | 1        | 7        | 0        | 14       | 4        | 0        |
| TGFBR2 | 87641  | 14       | 0        | 0        | 1        | 1        | 1        | 0        | 0        | 5        | 0        | 3        | 1        | 2        |
| TNNI3  | 5966   | 30       | 0        | 1        | 5        | 1        | 1        | 0        | 0        | 8        | 2        | 10       | 0        | 2        |
| TP53   | 20303  | 2003     | 137      | 113      | 158      | 121      | 142      | 109      | 165      | 284      | 156      | 252      | 202      | 164      |
| TPI1   | 3287   | 11       | 0        | 0        | 1        | 1        | 1        | 0        | 0        | 1        | 0        | 4        | 1        | 2        |
| TSC1   | 53285  | 44       | 2        | 0        | 1        | 1        | 1        | 2        | 5        | 19       | 5        | 5        | 3        | 0        |
| TSC2   | 40724  | 165      | 7        | 4        | 6        | 5        | 13       | 5        | 22       | 48       | 18       | 22       | 10       | 5        |
| TSHR   | 190778 | 45       | 1        | 0        | 3        | 1        | 9        | 2        | 3        | 8        | 1        | 12       | 2        | 3        |
| TTR    | 6944   | 98       | 4        | 5        | 10       | 6        | 15       | 9        | 6        | 5        | 1        | 19       | 11       | 7        |
| TYR    | 117888 | 205      | 10       | 10       | 22       | 6        | 16       | 6        | 16       | 27       | 13       | 42       | 26       | 11       |
| UROD   | 3512   | 45       | 0        | 1        | 2        | 5        | 6        | 2        | 3        | 9        | 2        | 11       | 2        | 2        |
| USH2A  | 800503 | 66       | 0        | 3        | 1        | 1        | 2        | 3        | 6        | 24       | 3        | 8        | 10       | 5        |
| VHL    | 10444  | 172      | 5        | 7        | 12       | 13       | 22       | 15       | 7        | 22       | 21       | 17       | 18       | 13       |
| WRN    | 140499 | 22       | 3        | 1        | 1        | 1        | 1        | 0        | 0        | 11       | 2        | 1        | 1        | 0        |
| WT1    | 47763  | 56       | 1        | 2        | 5        | 1        | 6        | 3        | 3        | 13       | 4        | 11       | 5        | 2        |
